# Supplementary material for: Pretreatment with Shuanghe‐Tang Extract Attenuates Postischemic Brain Injury and Edema in a Mouse Model of Stroke: An Analysis of Medicinal Herbs Listed in Dongui Bogam
Source: Hindawi journal article supplement (doi:10.1155/2018/2479602), 2018-01-01

# Supplementary Figure S1

## A Preparation of ethanol extracts

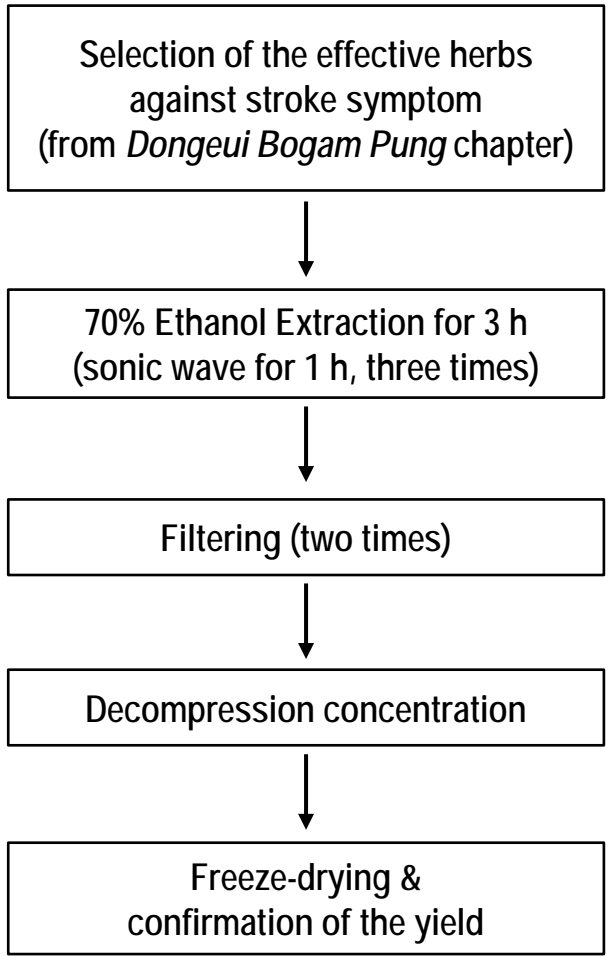

## B Preparation of water extracts

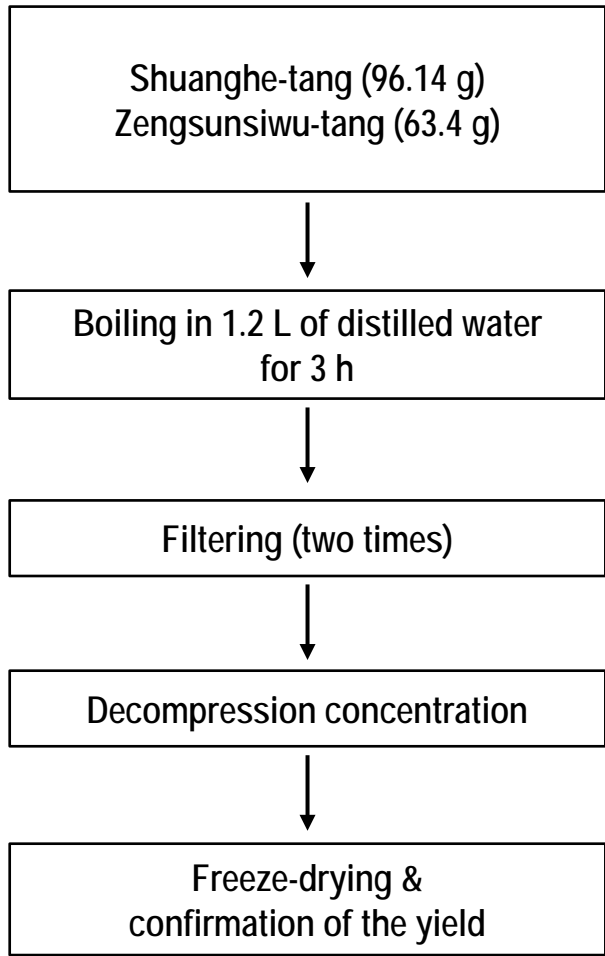

# Supplementary Figure S2

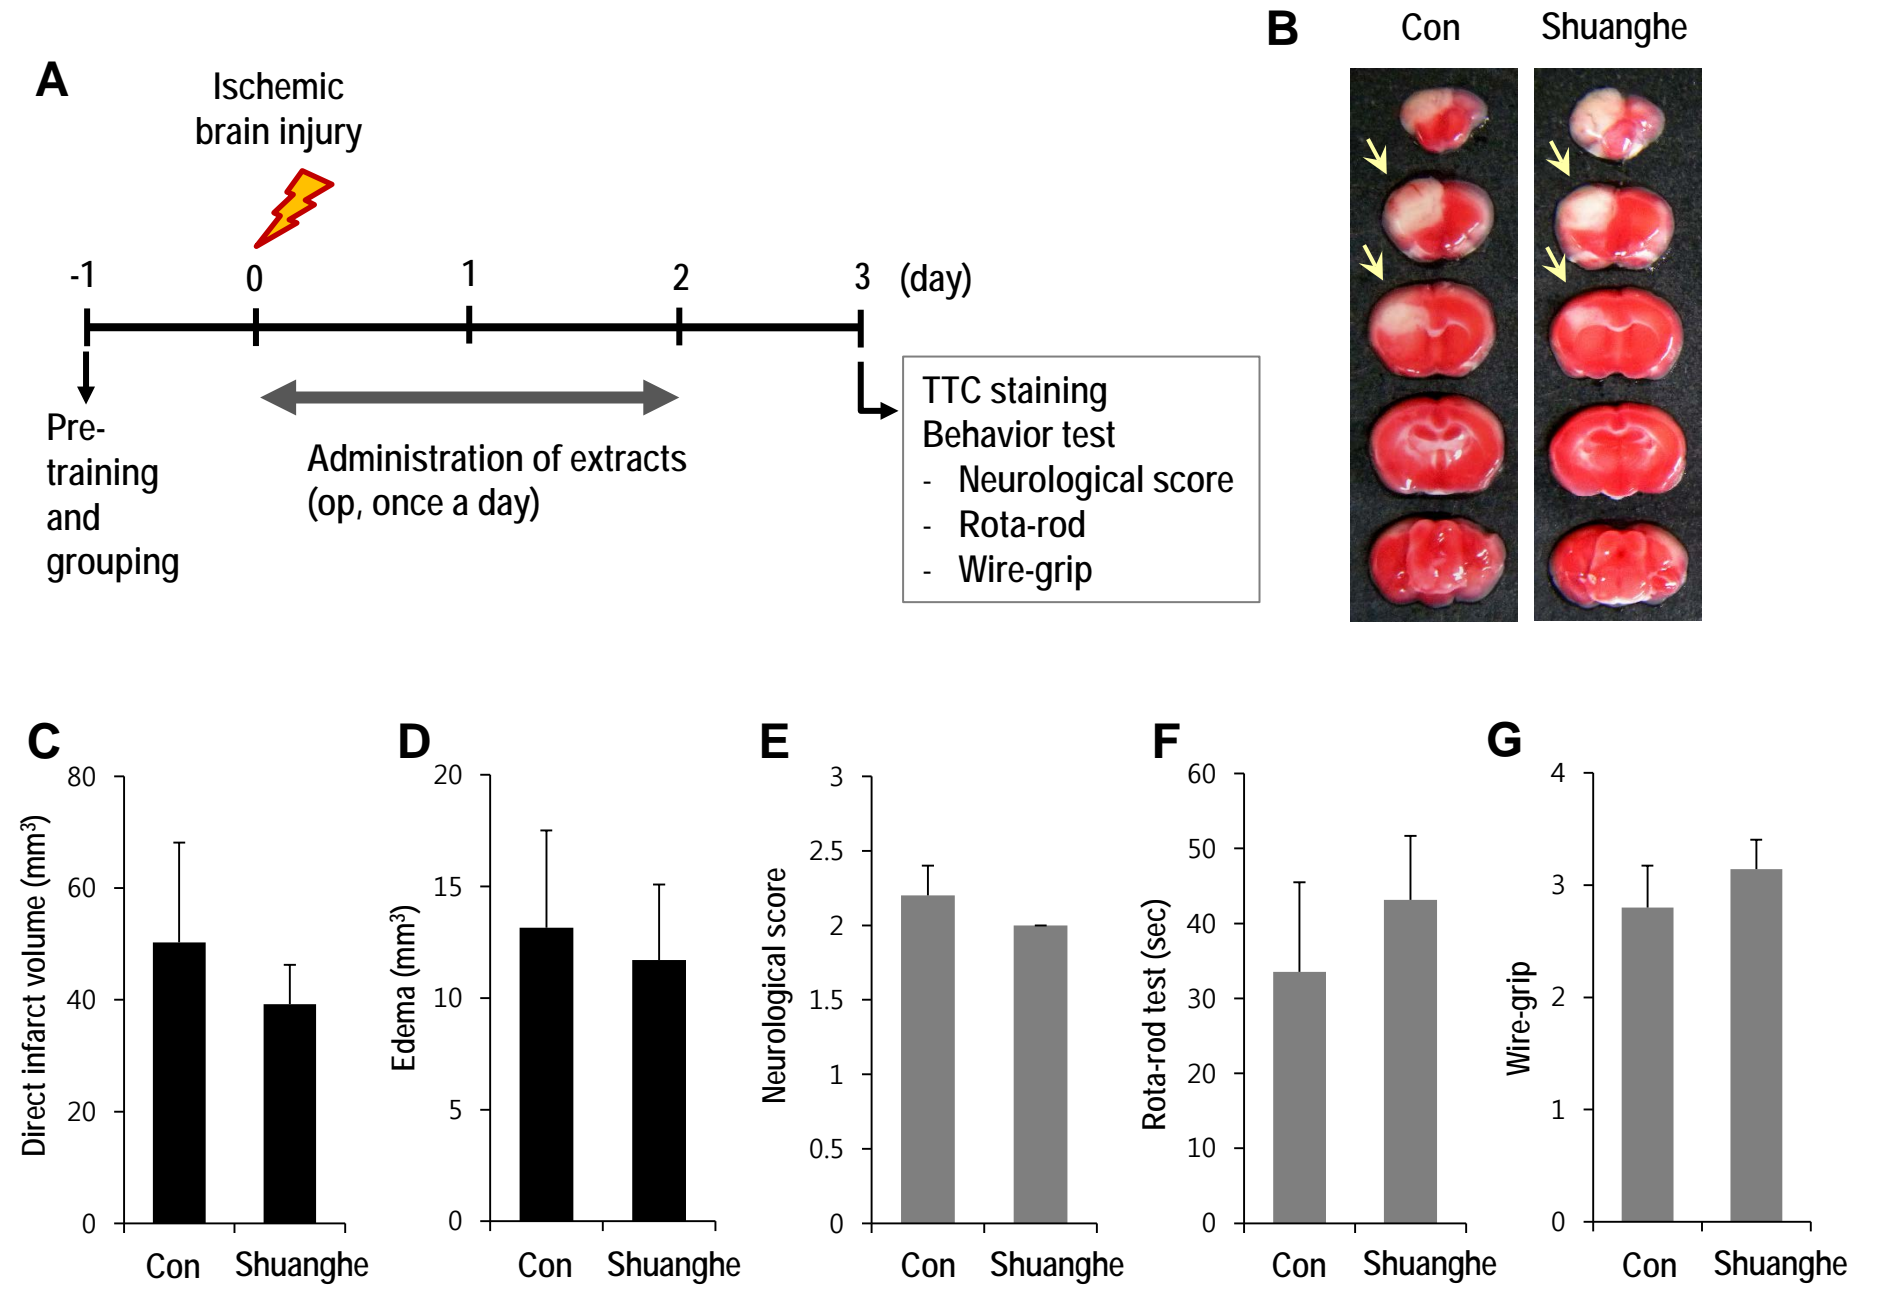

Supplement: f1 [file 2479602.f1.pdf]
